# Supplementary material for: Inflammation causes insulin resistance in mice via interferon regulatory factor 3 (IRF3)-mediated reduction in FAHFA levels
Source: PubMed Central journal article supplement (PMC11139994; doi:10.1038/s41467-024-48220-5), 2024-05-30
Supplement: 41467_2024_48220_MOESM1_ESM.pdf [file 41467_2024_48220_MOESM1_ESM.pdf]

Supplemental Figure 1

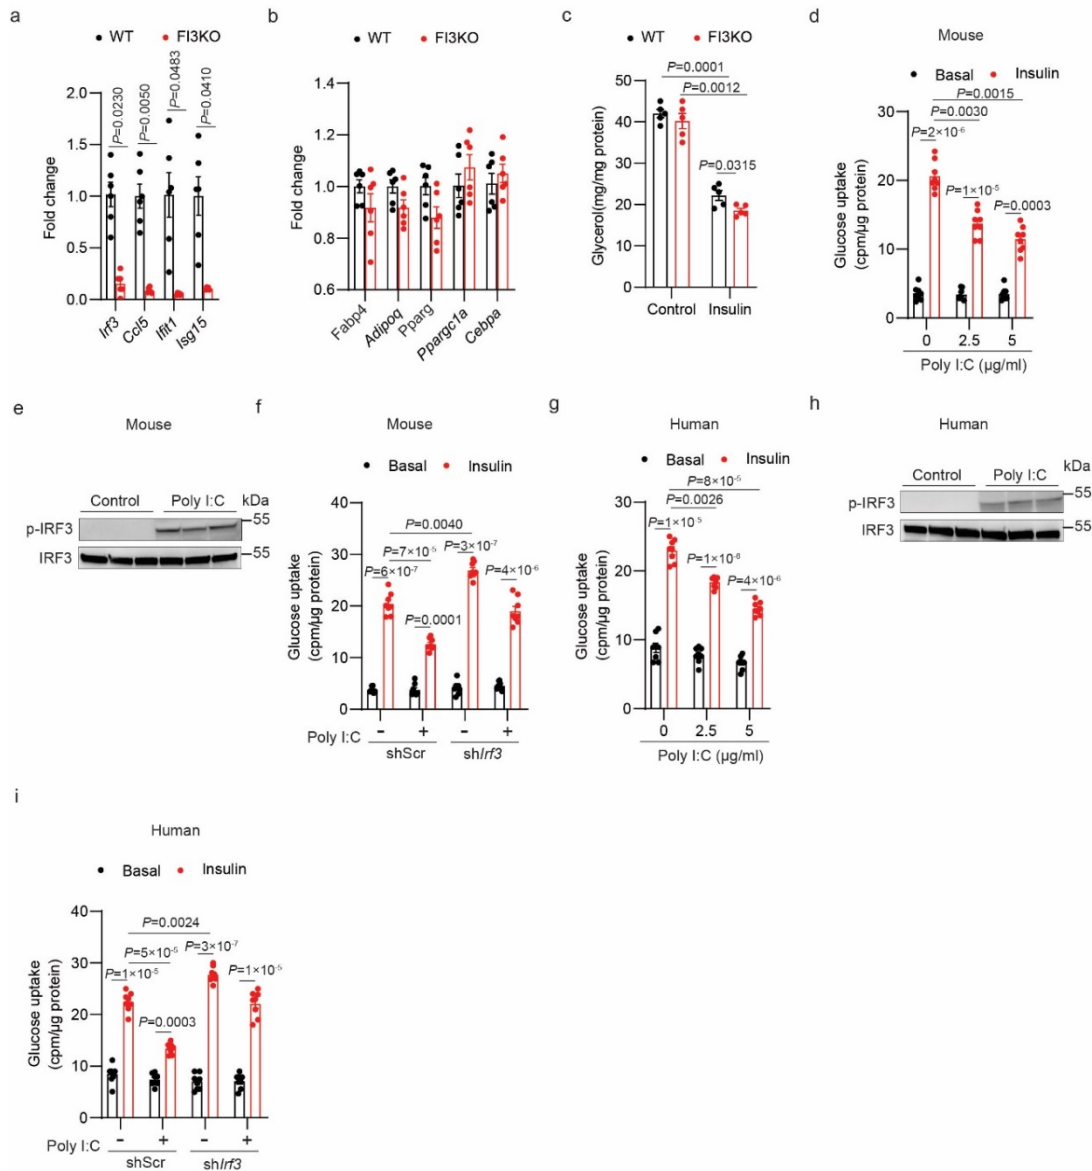

**Supplementary Fig. 1. IRF3 is necessary for TLR3-mediated insulin resistance in mouse and human adipocytes.** **a**, mRNA analysis of *Irf3*, *Ccl5*, *Ifit1*, and *Isg15* in WT and FI3KO SVF-derived adipocytes (n=6). **b**, mRNA analysis of *Fabp4*, *Adipoq*, *Pparg*, *Ppargc1a*, and *Cebpa* in WT and FI3KO SVF-derived adipocytes (n=5). **c**, Lipolysis in WT and FI3KO SVF-derived adipocytes treated with or without insulin (10nM, 4h) (n=5). **d**, Glucose uptake in mouse adipocytes after treatment with varying Poly I:C doses for 2 days (n=8). **e**, Western blot showing phosphorylation of murine IRF3 (S388) in mouse adipocytes after 30 mins of Poly I:C (5  $\mu$ g/ml) treatment. **f**, Glucose uptake in mouse adipocytes transduced with lentivirus expressing shRNA against *Irf3* or shScr control hairpin in the absence or presence of Poly I:C (5  $\mu$ g/ml) (n=8). **g**, Glucose uptake in human adipocytes after treatment with varying Poly I:C doses for 2 days (n=8). **h**, Western blot showing phosphorylation of human IRF3 (S396) in human adipocytes after 30 mins of Poly I:C (5  $\mu$ g/ml) treatment. **i**, Glucose uptake in human adipocytes transduced with lentivirus expressing shRNA against *Irf3* or shScr control hairpin in the absence or presence of Poly I:C (5  $\mu$ g/ml) (n=8). Statistical significance was assessed by *two-way ANOVA* (**c**, **d** and **g**) or *three-way ANOVA* (**f** and **i**). Data in all panels are expressed as mean  $\pm$  SEM.

Supplemental Figure 2

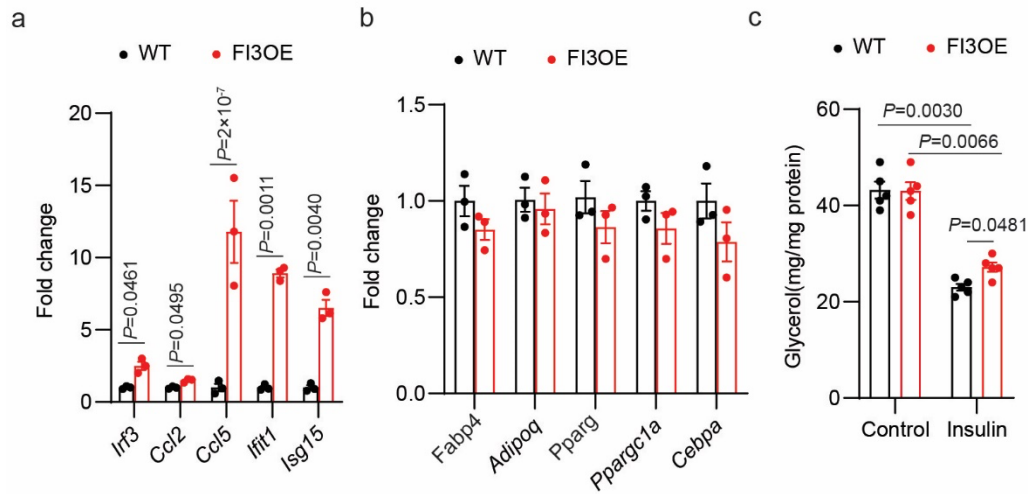

**Supplementary Fig. 2. Overexpression of IRF3 does not affect differentiation state in mature adipocytes.** **a**, mRNA analysis of *Irf3*, *Ccl5*, *Ifit1*, and *Isg15* in WT and FI3OE SVF-derived adipocytes (n=5). **b**, mRNA analysis of *Fabp4*, *Adipoq*, *Pparg*, *Ppargc1a*, and *Cebpa* in WT and FI3OE SVF-derived adipocytes (n=5). **c**, Lipolysis in WT and FI3OE SVF-derived adipocytes treated with or without insulin (10nM, 4h) (n=5). Statistical significance was assessed by two-tailed Student's *t*-test (**a**) or *three-way* ANOVA (**c**). Data in all panels are expressed as mean  $\pm$  SEM.

Supplemental Figure 3

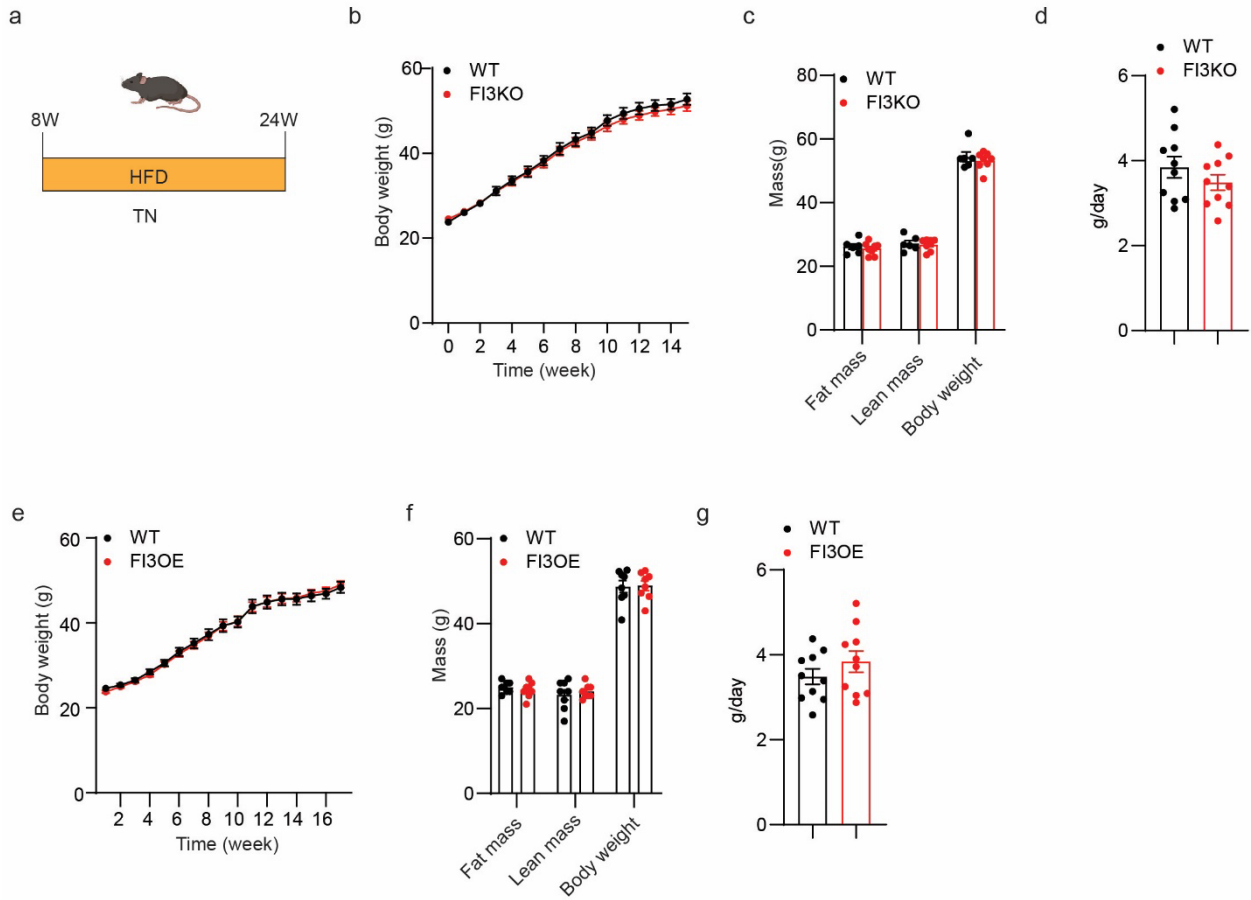

**Supplementary Fig. 3. Metabolic phenotype of FI3KO and FI3OE mice on HFD in thermoneutrality.** (a-d) Metabolic analysis of mice as described in Fig. 3a, body weight (b), body composition (c), and food intake (d). (e-g) Metabolic analysis of mice as described in Fig. 4a, body weight (e), body composition (f), and food intake (g). Mouse in Panel A created with Biorender.com.

Supplemental Figure 4

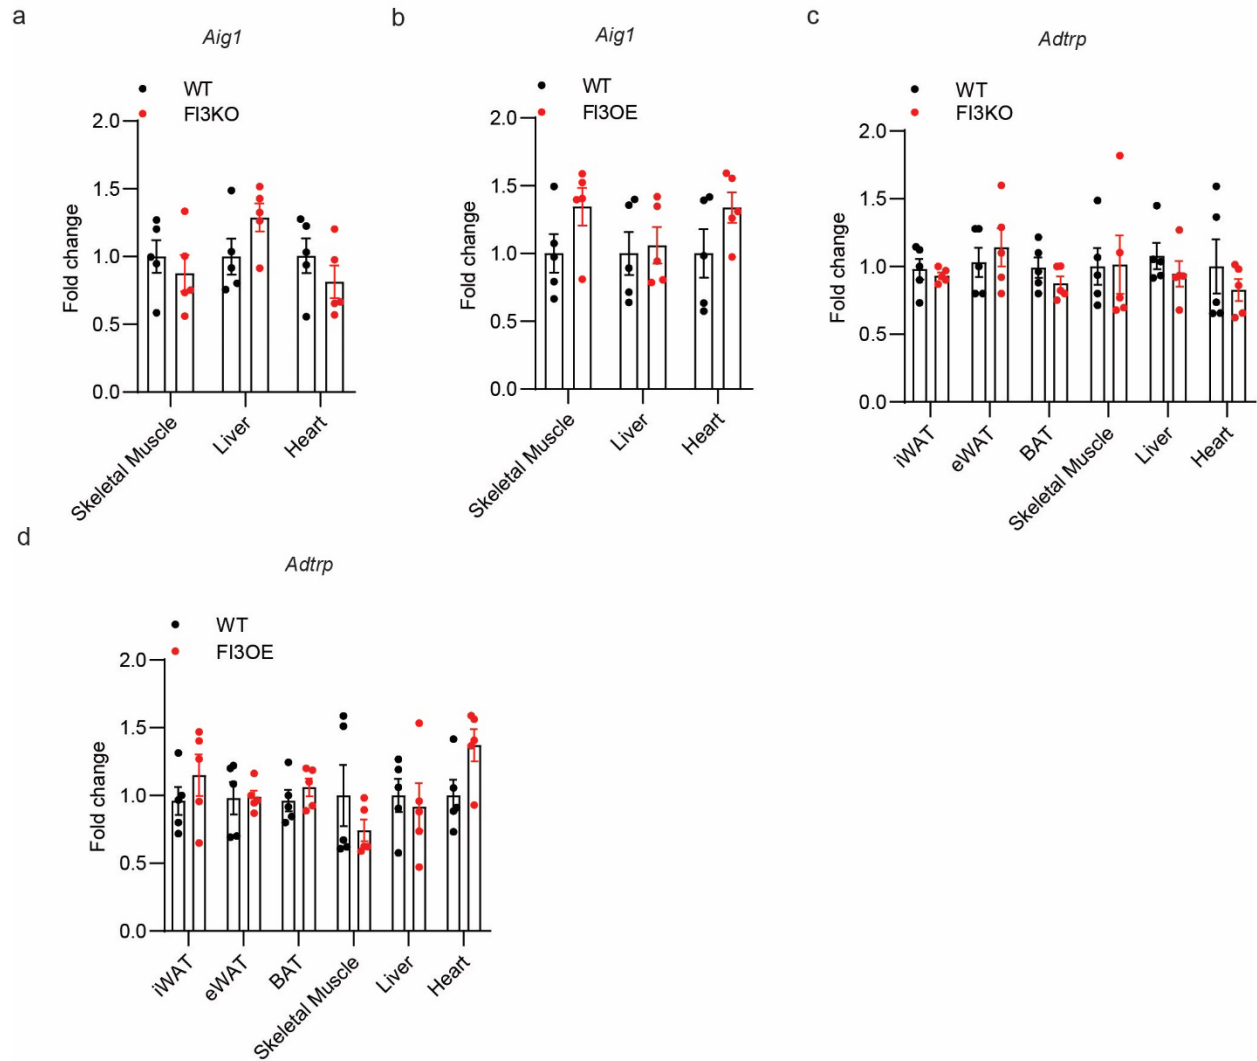

**Supplementary Fig. 4. IRF3 regulates AIG1 transcription in adipocytes.** **a**, mRNA analysis of *Aig1* in skeletal muscle, liver, and heart of WT and FI3KO mice (n=5). **b**, mRNA analysis of *Aig1* in skeletal muscle, liver, and heart of WT and FI3OE mice (n=5). **c**, mRNA analysis of *Adtrp* in skeletal muscle, liver, and heart of WT and FI3KO mice (n=5). **d**, mRNA analysis of *Adtrp* in skeletal muscle, liver, and heart of WT and FI3OE mice (n=5).

Supplemental Figure 5

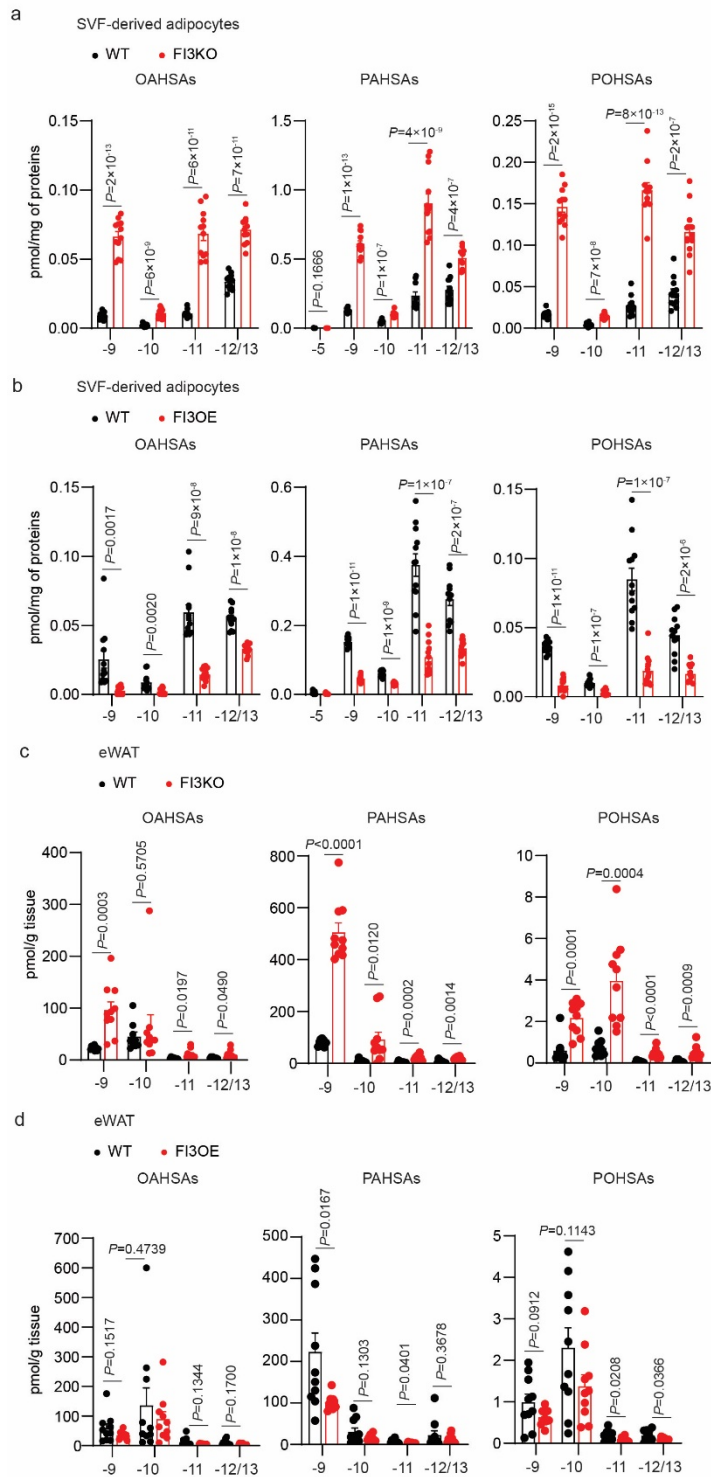

**Supplementary Fig. 5. IRF3 decreases FAHFAs in adipocytes.** **a**, Quantification of FAHFA isomers in WT and FI3KO SVF-derived adipocytes (n=12). **b**, Quantification of FAHFA isomers in WT and FI3OE SVF-derived adipocytes (n=12). **c**, Quantification of FAHFA isomers in eWAT of WT and FI3KO mice (n=10). **d**, Quantification of FAHFA isomers in eWAT of WT and FI3OE mice (n=10). Statistical significance was assessed by two-tailed Student's *t*-test. Data in all panels are expressed as mean  $\pm$  SEM.

Supplemental Figure 6

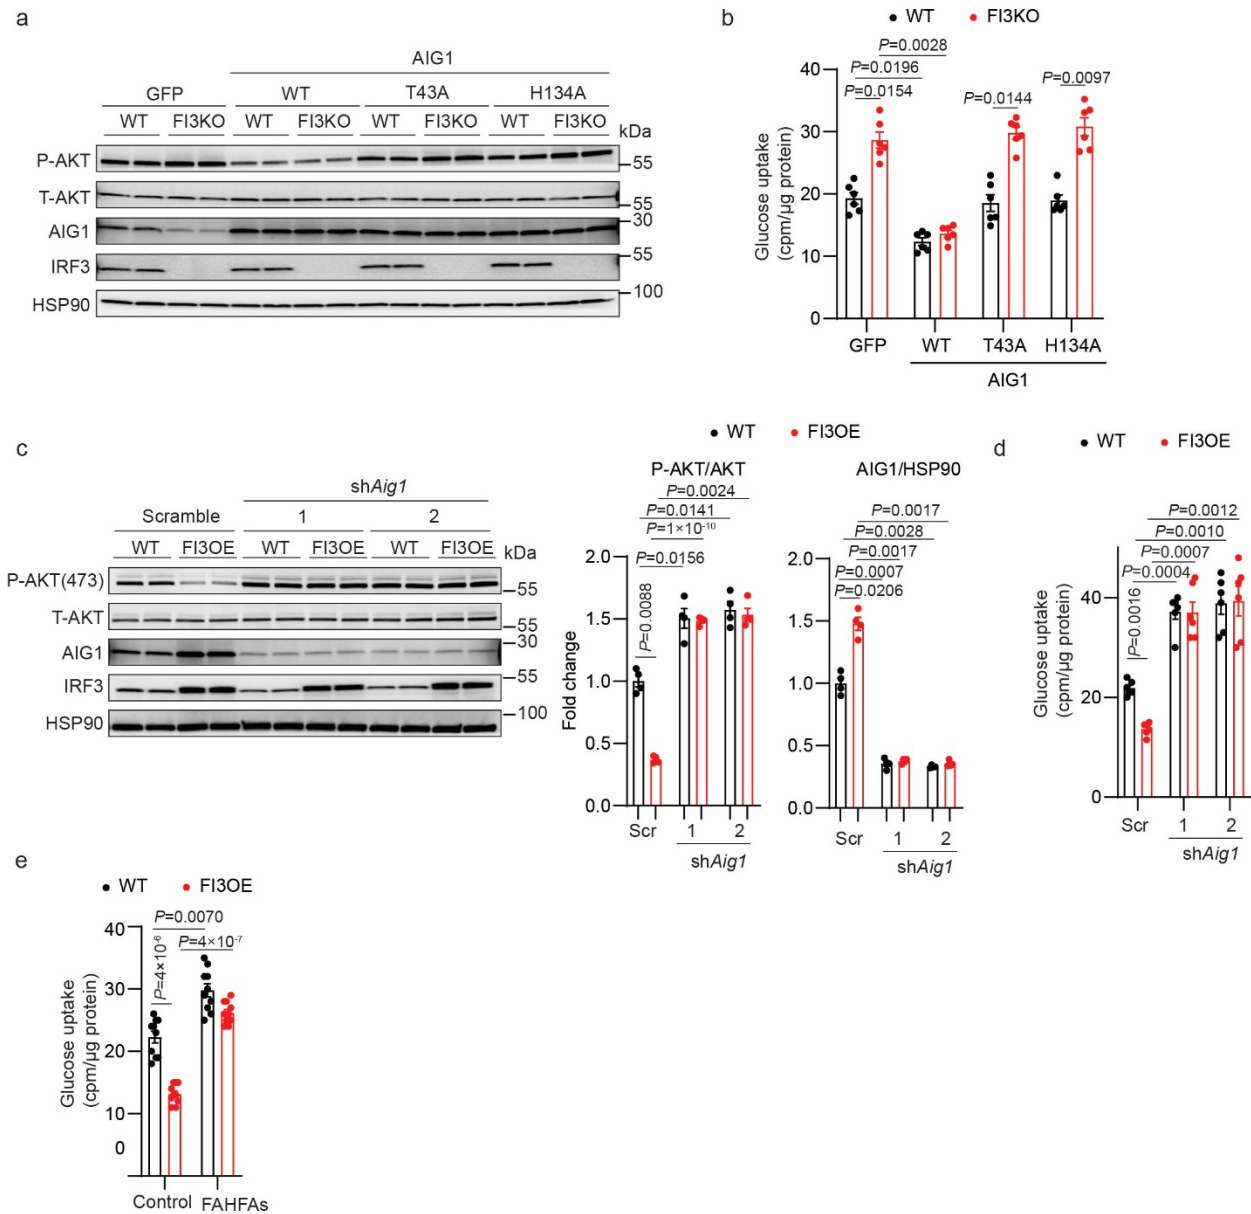

**Supplementary Fig. 6. IRF3 promotes insulin resistance through AIG1 in adipocytes.** **a**, Western blot of pAKT (S473) and IRF3, all lanes in the presence of insulin, **b**, Insulin-stimulated glucose uptake (n=6) in WT and FI3KO SVF-derived adipocytes infected with GFP, WT AIG1, T43A AIG1, or H134A AIG1 lentivirus. **c**, Western blot of pAKT (S473) and IRF3, **d**, Insulin-stimulated glucose uptake (n=6) in WT and FI3OE SVF-derived adipocytes infected lentivirus expressing shRNA against *Aig1* or shScr control hairpin. **e**, Insulin-stimulated glucose uptake in WT and FI3OE SVF-derived adipocytes treated with control or FAHFAs [9-PAHSA (20μM), 9-POHSA (20μM), and 9-OAHSA (20μM); total FAHFA levels 60μM] for 24h. Statistical significance was assessed by two-way ANOVA (b-e). Data in all panels are expressed as mean ± SEM.

Supplemental Figure 7

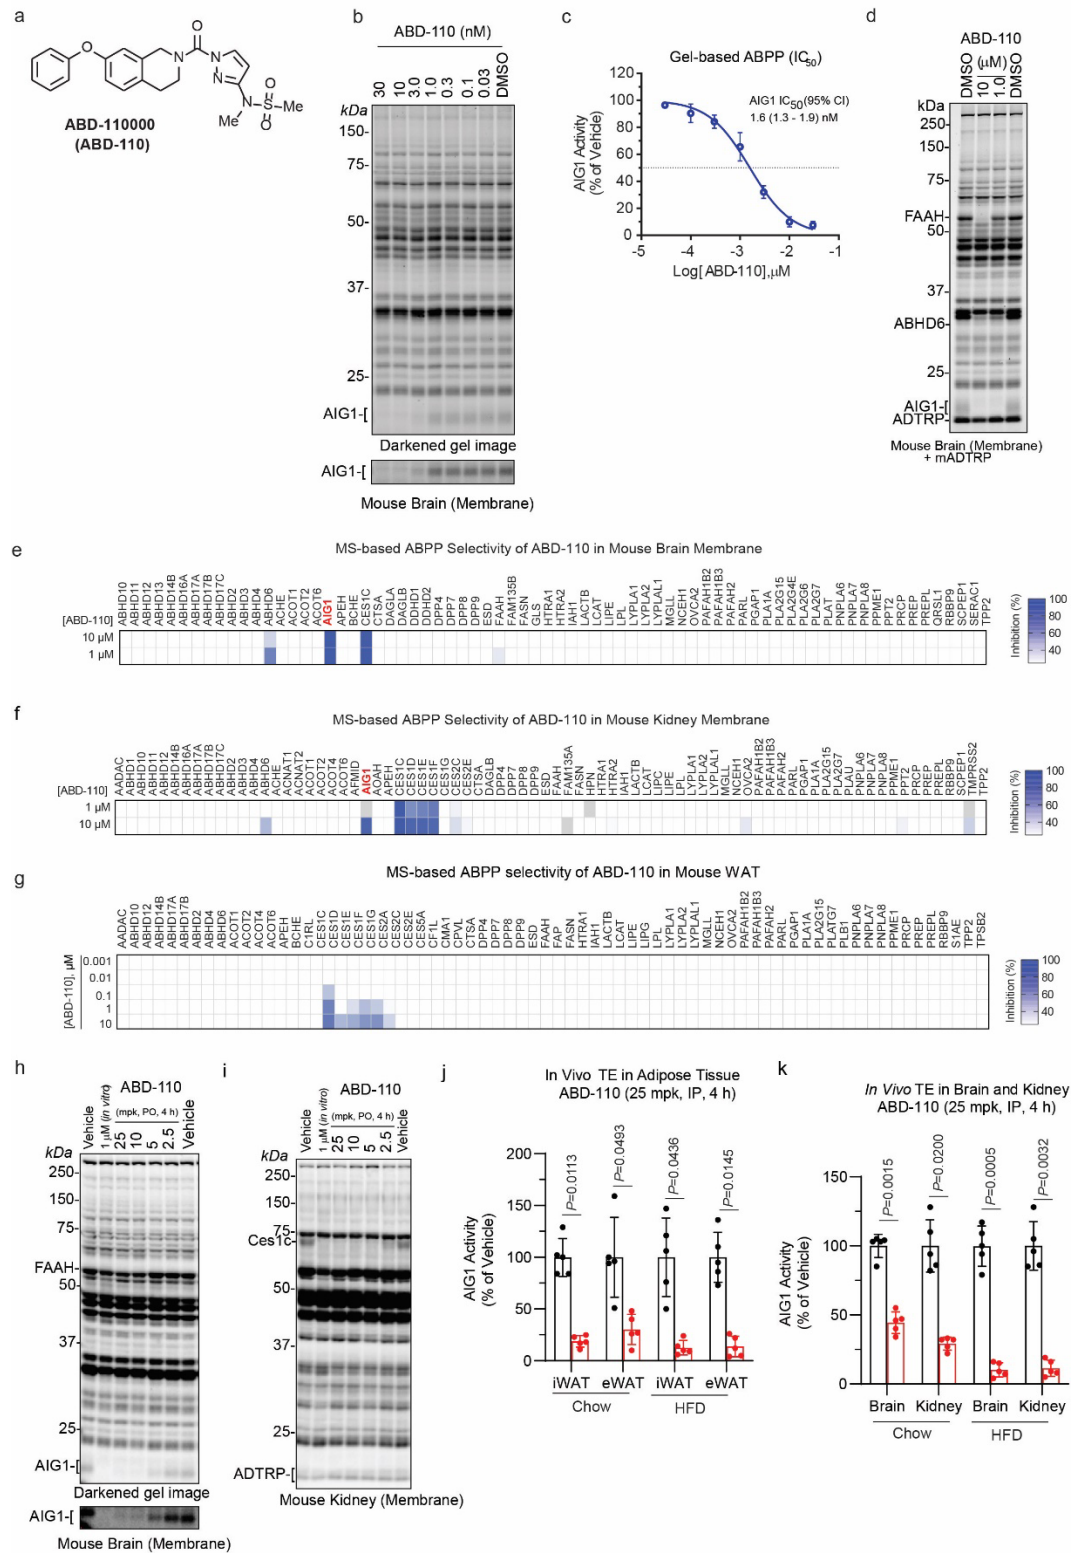

**Supplementary Fig. 7. Characterization of the AIG1 inhibitor ABD-110000.** **a**, Chemical structure of ABD-110000 (ABD-110). **b**, Competitive gel-based ABPP profile of ABD-110 (0.03–30 nM, 30 min) in mouse brain membrane proteome using FP-Rh. **c**, ABD-110 potency ( $IC_{50}$ ) for AIG1 determined by competitive

gel-based ABPP. Error bars represent SD from three replicates. **d**, Selectivity of ABD-110 (1 & 10  $\mu$ M, 30 min) against FP-Rh-reactive enzymes in mouse brain membrane proteomes spiked with mADTRP-transfected HEK293T cell proteomes. **e, f**, In-depth selectivity profile of ABD-110 (1.0 and 10  $\mu$ M) across serine/threonine hydrolase enzymes using MS-based ABPP profiles in mouse brain membrane (**e**) and kidney membrane (**f**) proteomes. Data presented represent mean inhibition from three replicates. Gray indicates targets that were not detected in any replicate. **g**, In-depth selectivity profile of ABD-110 (0.001-10  $\mu$ M, 1 h) across serine hydrolase enzymes using MS-based ABPP profiles in Chow-fed mouse eWAT proteomes. Data presented represent mean inhibition from three replicates. **h, i**, Gel-based ABPP profiles in brain (**h**) and kidney (**i**) membrane proteomes derived from C57Bl/6J mice treated with either vehicle or ABD-110 (2.5 - 25 mpk, PO) for 4 h. Selective AIG1 inhibition is observed in brain whereas kidney profiles, where AIG1 is not detectable, reveal high selectivity across additional peripheral serine hydrolases and ADTRP. **j, k**, *In vivo* AIG1 target engagement following ABD-110 administration. Chow or HFD-fed mice were dosed with vehicle or ABD-110 (25 mpk, IP) once daily for 2 weeks. Brain, kidney, eWAT, and iWAT tissues were harvested four hours after the final dose for MS-based ABPP analysis. AIG1 activity was determined by measuring the degree of activity-dependent AIG1 enrichment relative to the vehicle using parallel reaction monitoring (PRM) to detect and quantify diagnostic AIG1 peptides. Statistical significance was assessed by two-tailed Student's *t*-test.



Supplemental Figure 8

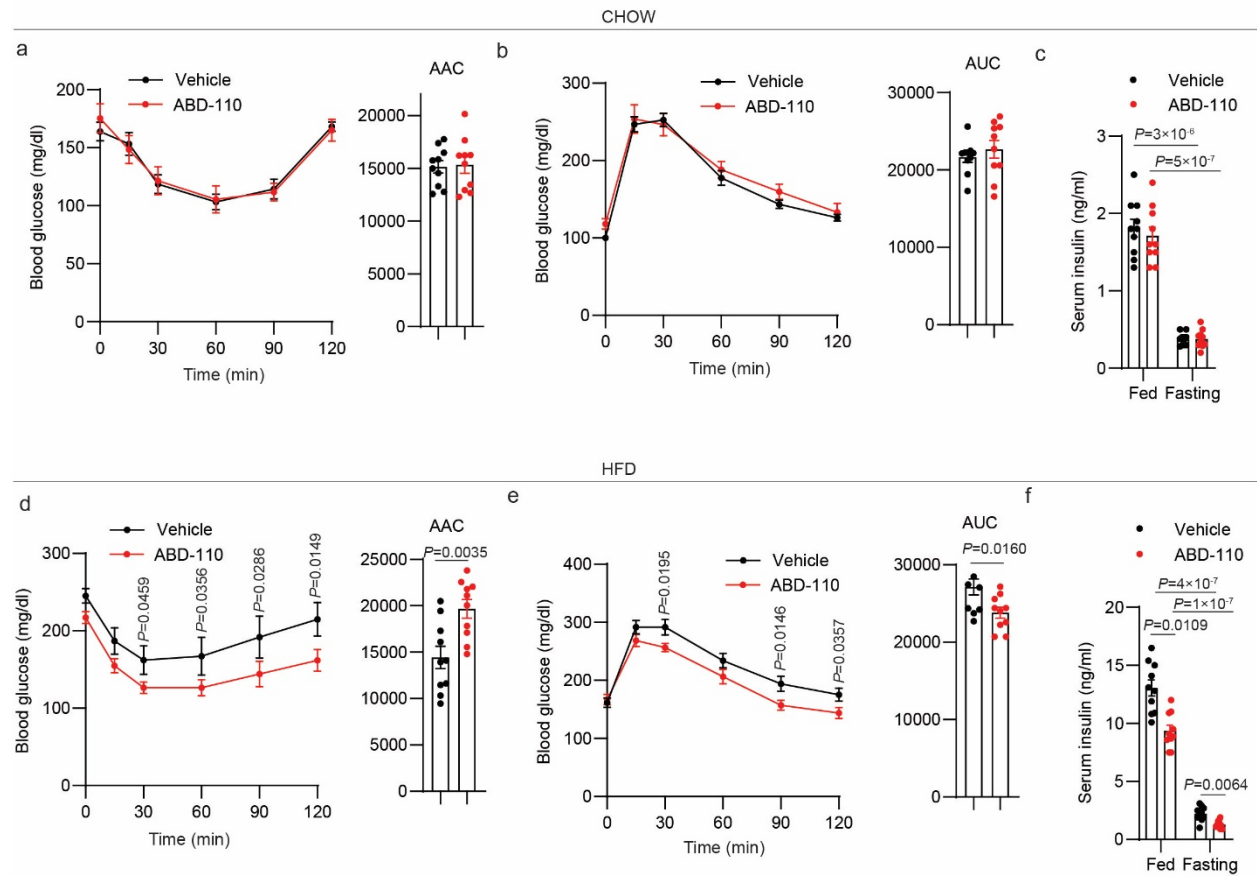

**Supplementary Fig. 8. Metabolic effects of ABD-110 on WT Chow and HFD mice.** Metabolic analysis of male WT mice ( $n=10$ ) dosed with vehicle or ABD-110 (25 mg/kg IP) once daily for 2 weeks, including insulin tolerance test (a), glucose tolerance test (b), *ad lib* fed serum insulin levels (c). Metabolic analysis of male WT mice ( $n=10$ ) after 16 weeks of HFD feeding dosed with vehicle or ABD-110 (25 mg/kg IP) once daily for 2 weeks, including insulin tolerance test (d), glucose tolerance test (e), *ad lib* fed serum insulin levels (f). Statistical significance was assessed by *two-way* ANOVA (c and f) or two-tailed Student's *t-test* (d and e). Data in all panels are expressed as mean  $\pm$  SEM.

Supplemental Figure 9

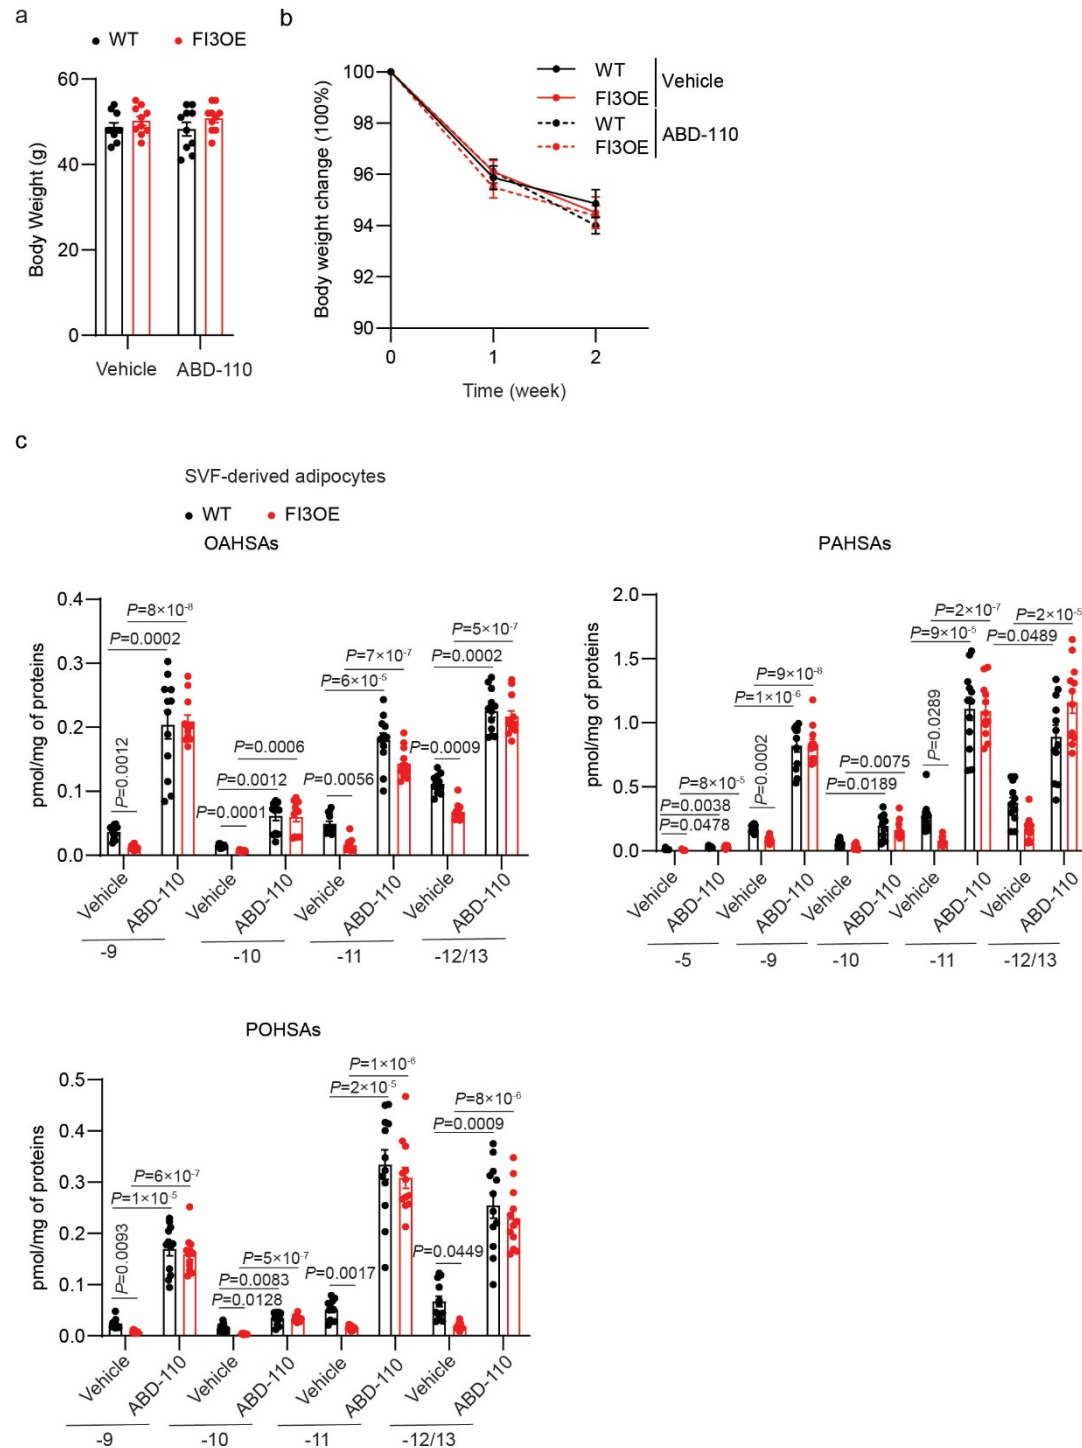

**Supplemental Fig. 9. Inhibition of AIG1 by ABD-110 ameliorates HFD-induced insulin resistance in FI3OE mice.** **a**, Body weight change of WT and FI3OE mice receiving a daily injection of vehicle or ABD-110 for two weeks (n=7-8). **b**, Body weight of WT and FI3OE mice after receiving a daily injection of vehicle or ABD-110 for two weeks (n=7-8). **c**, Quantification of FAHFA isomers in WT and FI3OE SVF-derived adipocytes treated with or without ABD-110 (1 $\mu$ M, 4h) (n=12). Data in all panels are expressed as mean  $\pm$  SEM.

Supplemental Figure 10

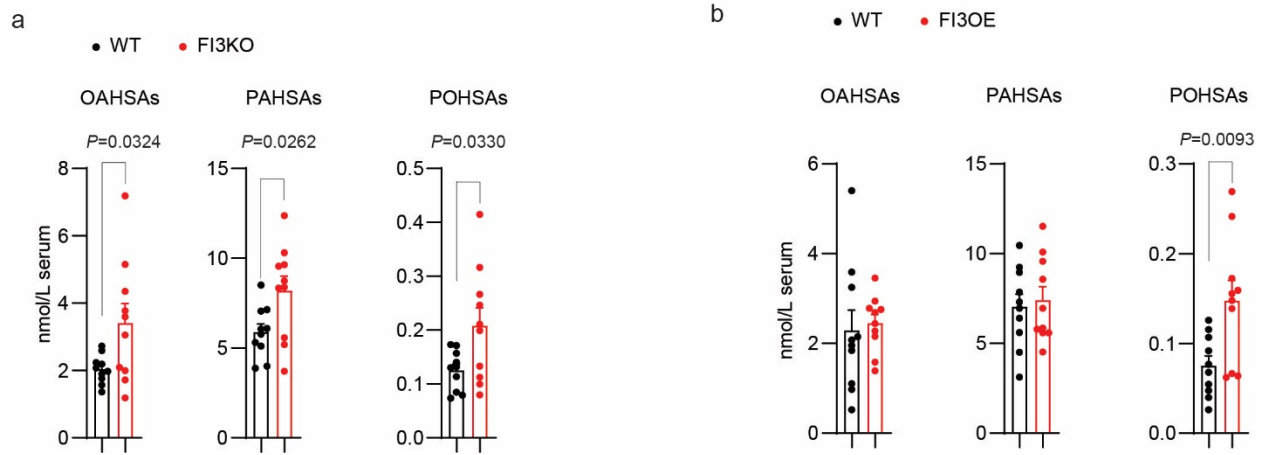

**Supplementary Fig. 10. IRF3 regulates serum levels of some FAHFAs. a,** Serum levels of OAHSAs, PAHSAs, and POHSAs in high fat-fed (16 weeks) FI3KO mice at thermoneutrality. **b,** Serum levels of OAHSAs, PAHSAs, and POHSAs in high fat-fed (16 weeks) FI3OE mice at thermoneutrality.

**Supplementary Table 1**

Primers used in this study

| Genes (mouse)   | Forward (5'-3')         | Reverse (5'-3')           |
|-----------------|-------------------------|---------------------------|
| <i>36B4</i>     | CACTGGTCTAGGACCCGAGAA   | AGGGGGAGATGTTTCAGCATGT    |
| <i>Aig1</i>     | ACCCAATCTTCTCTAAGCTGTGC | TCCACCTTCCAGCATGAATG      |
| <i>Irf3</i>     | CGTACATCTGGGTGCCTCTC    | TTTTCTTGGGGTGCAGGGTT      |
| <i>Ccl5</i>     | GCTGCTTTGCCTACCTCTCC    | TCGAGTGACAAACACGACTGC     |
| <i>Ifit1</i>    | CAAGGCAGGTTTCTGAGGAG    | TGAAGCAGATTCTCCATGACC     |
| <i>Isg15</i>    | CATCTATGAGGTCTTTCTGACGC | TTAGGCCATACTCCCCCAGC      |
| <i>Ap2</i>      | ACACCGAGATTTCTTCAAACCTG | CCATCTAGGGTTATGATGCTCTTCA |
| <i>Adipoq</i>   | TGTTCTCTTAATCCTGCCCA    | CCAACCTGCACAAGTTCCCTT     |
| <i>Ppargc1a</i> | CCCTGCCATTGTTAAGACC     | TGCTGCTGTTCTGTTTTTC       |
| <i>Cebpa</i>    | TGGCCTGGAGACGCAATGA     | CGCAGAGATTGTGCGTCTTT      |
| <i>Fabp4</i>    | AAGGTGAAGAGCATCATAACCCT | TCACGCCTTTCATAACACATTCC   |
| <i>Adtrp</i>    | TCACATCCCACAGATTGGAAGG  | AATGGCCTGCAAGAGCAGATT     |

**Supplementary Table 2**

Peptides targeted by parallel reaction monitoring to measure AIG1 target engagement in vivo.

| <b>PROTEIN</b> | <b>PEPTIDE SEQUENCE</b> | <b>M/Z</b> | <b>Z</b> |
|----------------|-------------------------|------------|----------|
| Aig1           | AIEM[+16]PSHQTYGGSWK    | 569.9314   | 3        |
| Aig1           | EM[+16]IYPR             | 412.7022   | 2        |
| Fasn           | VGDPQELNGITR            | 649.8386   | 2        |
| Fasn           | LFDHPEVPTPPESASVSR      | 655.6619   | 3        |
| Fasn           | GVDLVLNSLAEEK           | 693.8774   | 2        |
| Pcca           | TVAIHSDVDASSVHK         | 555.6249   | 3        |
| Pcca           | FLSDVYPDGFK             | 644.3164   | 2        |
| Pc             | SLPDLGLR                | 435.7558   | 2        |
| Pc             | DFTATFGPLDSLNT          | 827.9072   | 2        |

## Supplementary Note 1: Lipidomics Checklist

## Overall study design

|                        |                                                                                                                     |                                         |                          |
|------------------------|---------------------------------------------------------------------------------------------------------------------|-----------------------------------------|--------------------------|
| Title of the study     | Inflammation causes insulin resistance via interferon regulatory factor 3 (IRF3)-mediated reduction in FAHFA levels |                                         |                          |
| Document creation date | 01/11/2024                                                                                                          | Corresponding Email                     | erosen@bidmc.harvard.edu |
| Principle investigator | Evan Rosen and Barbara B. Kahn                                                                                      | Is the workflow targeted or untargeted? | Targeted                 |
| Institution            | Beth Israel Deaconess Medical Center, Harvard Medical School                                                        | Clinical                                | No                       |

## Lipid extraction

|                   |                                                |                                                 |     |
|-------------------|------------------------------------------------|-------------------------------------------------|-----|
| Extraction method | Solid-phase extraction only for eWAT and serum | Were internal standards added prior extraction? | Yes |
| pH adjustment     | None                                           |                                                 |     |

## Analytical platform

|                                 |                                                                            |                                                                        |                |
|---------------------------------|----------------------------------------------------------------------------|------------------------------------------------------------------------|----------------|
| Which solvents were used        | 93:7 methanol/water with 5mM ammonium acetate and 0.01% ammonium hydroxide | Ion source                                                             | ESI            |
| Number of separation dimensions | One dimension                                                              | MS Level                                                               | MS2            |
| Separation type 1               | LC                                                                         | Mass window for precursor ion isolation (in Da total isolation window) | 1              |
| Separation mode 1 (liquid)      | RP                                                                         | Mass resolution for detected ion at MS2                                | Low resolution |
| Detector                        | Mass spectrometer                                                          | Resolution at MS2                                                      | Low            |
| MS type                         | QQQ                                                                        | Was/Were additional dimension/techniques used                          | No             |
| MS vendor                       | Agilent                                                                    |                                                                        |                |

## Quality control

|                |                                   |                   |                    |
|----------------|-----------------------------------|-------------------|--------------------|
| Blanks         | Yes                               | Quality control   | Yes                |
| Type of Blanks | Extraction blank, Injection blank | Type of QC sample | Reference material |

## Method qualification and validation

|                                                      |     |                     |                                                                    |
|------------------------------------------------------|-----|---------------------|--------------------------------------------------------------------|
| Method validation                                    | Yes | Precision           | Yes                                                                |
| Lipid recovery                                       | No  | Accuracy            | Yes                                                                |
| Dynamic quantification range                         | No  | Guidelines followed | This method was published in Nature Protocols (Zhang et al., 2016) |
| Limit of quantitation (LOQ)/Limit of detection (LOD) | Yes |                     |                                                                    |

## Reporting

|                                                 |                      |                     |     |
|-------------------------------------------------|----------------------|---------------------|-----|
| Are reported raw data uploaded into repository? | No                   | Raw data upload     | Yes |
| Are metadata available?                         | Available on request | Additional comments | -   |

## Sample Descriptions

### WT and IRF3 KO Stromal Vascular Fraction (SVF) derived adipocytes / Mouse / Cells

|                                      |        |                                      |      |
|--------------------------------------|--------|--------------------------------------|------|
| Provided information                 | -      | Additives                            | None |
| Temperature handling original sample | 4-8 °C | Were samples stored under inert gas? | No   |
| Instant sample preparation           | No     | Additional preservation methods      | No   |
| Storage temperature                  | -80 °C | Biobank samples                      | No   |

### WT and IRF3 overexpressing SVF derived adipocytes / Mouse / Cells

|                                      |        |                                      |      |
|--------------------------------------|--------|--------------------------------------|------|
| Provided information                 | -      | Additives                            | None |
| Temperature handling original sample | 4-8 °C | Were samples stored under inert gas? | No   |
| Instant sample preparation           | No     | Additional preservation methods      | No   |
| Storage temperature                  | -80 °C | Biobank samples                      | No   |

### epididymal White Adipose Tissue (eWAT) samples from WT and IRF3 KO mice / Mouse / Tissues (e.g., liver, heart, brain)

|                                      |        |                                      |                                                         |
|--------------------------------------|--------|--------------------------------------|---------------------------------------------------------|
| Perfusion                            | No     | Were samples stored under inert gas? | No                                                      |
| Provided information                 | -      | Additional preservation methods      | No                                                      |
| Temperature handling original sample | 4-8 °C | Biobank samples                      | No                                                      |
| Instant sample preparation           | No     | Sample homogenization                | Yes                                                     |
| Storage temperature                  | -80 °C | Sample homogenization solvent        | PBS:Methanol:Chloroform (plus Internal Standards) 1:1:2 |
| Additives                            | None   |                                      |                                                         |

### eWAT samples from WT and IRF3 overexpressing mice / Mouse / Tissues (e.g., liver, heart, brain)

|                                      |        |                                      |                                                         |
|--------------------------------------|--------|--------------------------------------|---------------------------------------------------------|
| Perfusion                            | No     | Were samples stored under inert gas? | No                                                      |
| Provided information                 | -      | Additional preservation methods      | No                                                      |
| Temperature handling original sample | 4-8 °C | Biobank samples                      | No                                                      |
| Instant sample preparation           | No     | Sample homogenization                | Yes                                                     |
| Storage temperature                  | -80 °C | Sample homogenization solvent        | PBS:Methanol:Chloroform (plus Internal Standards) 1:1:2 |
| Additives                            | None   |                                      |                                                         |



### serum from WT and IRF3 KO mice / Mouse / Serum

| Provided information                 |        | Additives                            |    |
|--------------------------------------|--------|--------------------------------------|----|
| -                                    |        | None                                 |    |
| Temperature handling original sample | 4-8 °C | Were samples stored under inert gas? | No |
| Instant sample preparation           | No     | Additional preservation methods      | No |
| Storage temperature                  | -80 °C | Biobank samples                      | No |

### serum from WT and IRF3 overexpressing mice / Mouse / Serum

| Provided information                 |        | Additives                            |    |
|--------------------------------------|--------|--------------------------------------|----|
| -                                    |        | None                                 |    |
| Temperature handling original sample | 4-8 °C | Were samples stored under inert gas? | No |
| Instant sample preparation           | No     | Additional preservation methods      | No |
| Storage temperature                  | -80 °C | Biobank samples                      | No |

### SVF derived adipocytes from WT and IRF3 overexpressing mice +/-AIG1 inhibitor / Mouse / Cells

| Provided information                 |        | Additives                            |    |
|--------------------------------------|--------|--------------------------------------|----|
| -                                    |        | None                                 |    |
| Temperature handling original sample | 4-8 °C | Were samples stored under inert gas? | No |
| Instant sample preparation           | No     | Additional preservation methods      | No |
| Storage temperature                  | -80 °C | Biobank samples                      | No |

# Lipid Class Descriptions

## 1) FAHFA[M-H]- / Lipid identification

| Lipid class                                                                                                                                                                                                                                                                                                                                                                                                                                                                                 | FAHFA         | Check isomer overlap                                  | No                                                            |               |                             |                             |                             |                             |                            |                            |                            |                            |
|---------------------------------------------------------------------------------------------------------------------------------------------------------------------------------------------------------------------------------------------------------------------------------------------------------------------------------------------------------------------------------------------------------------------------------------------------------------------------------------------|---------------|-------------------------------------------------------|---------------------------------------------------------------|---------------|-----------------------------|-----------------------------|-----------------------------|-----------------------------|----------------------------|----------------------------|----------------------------|----------------------------|
| Derivatization                                                                                                                                                                                                                                                                                                                                                                                                                                                                              | -             | RT verified by standard                               | Yes                                                           |               |                             |                             |                             |                             |                            |                            |                            |                            |
| MS Level for identification                                                                                                                                                                                                                                                                                                                                                                                                                                                                 | MS2           | Separation of isobaric/isomeric interferece confirmed | Yes                                                           |               |                             |                             |                             |                             |                            |                            |                            |                            |
| Identification level                                                                                                                                                                                                                                                                                                                                                                                                                                                                        | Species level | Model for separation prediction                       | Yes                                                           |               |                             |                             |                             |                             |                            |                            |                            |                            |
| Polarity mode                                                                                                                                                                                                                                                                                                                                                                                                                                                                               | Negative      | Additional dimension/techniques                       | -                                                             |               |                             |                             |                             |                             |                            |                            |                            |                            |
| Type of negative (precursor)ion                                                                                                                                                                                                                                                                                                                                                                                                                                                             | [M-H]-        | Lipid Identification Software                         | Qualitative Analysis of MassHunter Acquisition Data (Agilent) |               |                             |                             |                             |                             |                            |                            |                            |                            |
| Fragments for identification                                                                                                                                                                                                                                                                                                                                                                                                                                                                |               | Data manipulation                                     | Smoothing                                                     |               |                             |                             |                             |                             |                            |                            |                            |                            |
| <table border="1"> <thead> <tr> <th>Fragment name</th> </tr> </thead> <tbody> <tr> <td>PAHSA m/z 537.5 → m/z 255.2</td> </tr> <tr> <td>PAHSA m/z 537.5 → m/z 281.2</td> </tr> <tr> <td>OAHSA m/z 563.5 → m/z 281.2</td> </tr> <tr> <td>OAHSA m/z 563.5 → m/z 299.3</td> </tr> <tr> <td>POHSA m/z 535.5→ m/z 299.3</td> </tr> <tr> <td>POHSA m/z 535.5→ m/z 253.2</td> </tr> <tr> <td>POHSA m/z 535.5→ m/z 271.3</td> </tr> <tr> <td>POHSA m/z 535.5→ m/z 281.2</td> </tr> </tbody> </table> |               |                                                       |                                                               | Fragment name | PAHSA m/z 537.5 → m/z 255.2 | PAHSA m/z 537.5 → m/z 281.2 | OAHSA m/z 563.5 → m/z 281.2 | OAHSA m/z 563.5 → m/z 299.3 | POHSA m/z 535.5→ m/z 299.3 | POHSA m/z 535.5→ m/z 253.2 | POHSA m/z 535.5→ m/z 271.3 | POHSA m/z 535.5→ m/z 281.2 |
| Fragment name                                                                                                                                                                                                                                                                                                                                                                                                                                                                               |               |                                                       |                                                               |               |                             |                             |                             |                             |                            |                            |                            |                            |
| PAHSA m/z 537.5 → m/z 255.2                                                                                                                                                                                                                                                                                                                                                                                                                                                                 |               |                                                       |                                                               |               |                             |                             |                             |                             |                            |                            |                            |                            |
| PAHSA m/z 537.5 → m/z 281.2                                                                                                                                                                                                                                                                                                                                                                                                                                                                 |               |                                                       |                                                               |               |                             |                             |                             |                             |                            |                            |                            |                            |
| OAHSA m/z 563.5 → m/z 281.2                                                                                                                                                                                                                                                                                                                                                                                                                                                                 |               |                                                       |                                                               |               |                             |                             |                             |                             |                            |                            |                            |                            |
| OAHSA m/z 563.5 → m/z 299.3                                                                                                                                                                                                                                                                                                                                                                                                                                                                 |               |                                                       |                                                               |               |                             |                             |                             |                             |                            |                            |                            |                            |
| POHSA m/z 535.5→ m/z 299.3                                                                                                                                                                                                                                                                                                                                                                                                                                                                  |               |                                                       |                                                               |               |                             |                             |                             |                             |                            |                            |                            |                            |
| POHSA m/z 535.5→ m/z 253.2                                                                                                                                                                                                                                                                                                                                                                                                                                                                  |               |                                                       |                                                               |               |                             |                             |                             |                             |                            |                            |                            |                            |
| POHSA m/z 535.5→ m/z 271.3                                                                                                                                                                                                                                                                                                                                                                                                                                                                  |               |                                                       |                                                               |               |                             |                             |                             |                             |                            |                            |                            |                            |
| POHSA m/z 535.5→ m/z 281.2                                                                                                                                                                                                                                                                                                                                                                                                                                                                  |               |                                                       |                                                               |               |                             |                             |                             |                             |                            |                            |                            |                            |
| Isotope correction at MS2                                                                                                                                                                                                                                                                                                                                                                                                                                                                   | No            | Nomenclature for intact lipid molecule                | No                                                            |               |                             |                             |                             |                             |                            |                            |                            |                            |
| MS2 verified by standard                                                                                                                                                                                                                                                                                                                                                                                                                                                                    | Yes           | Nomenclature for fragment ions                        | No                                                            |               |                             |                             |                             |                             |                            |                            |                            |                            |
| Background check at MS2                                                                                                                                                                                                                                                                                                                                                                                                                                                                     | No            | Further identification remarks                        | -                                                             |               |                             |                             |                             |                             |                            |                            |                            |                            |
| Did you presume assumptions for identification?                                                                                                                                                                                                                                                                                                                                                                                                                                             | No            |                                                       |                                                               |               |                             |                             |                             |                             |                            |                            |                            |                            |

## 1) FAHFA[M-H]- / Lipid quantification

| Quantitative                                                                                                                                                                                                                                                                                                                                                                                                     | Yes                      | Limit of quantification        | S/N ratio                                                     |                   |             |                     |               |                       |                 |               |                       |       |                |                       |       |
|------------------------------------------------------------------------------------------------------------------------------------------------------------------------------------------------------------------------------------------------------------------------------------------------------------------------------------------------------------------------------------------------------------------|--------------------------|--------------------------------|---------------------------------------------------------------|-------------------|-------------|---------------------|---------------|-----------------------|-----------------|---------------|-----------------------|-------|----------------|-----------------------|-------|
| MS Level for quantification                                                                                                                                                                                                                                                                                                                                                                                      | MS2                      | Normalization to reference     | No                                                            |                   |             |                     |               |                       |                 |               |                       |       |                |                       |       |
| Internal lipid standard(s) MS2                                                                                                                                                                                                                                                                                                                                                                                   |                          | Lipid Quantification Software  | Qualitative Analysis of MassHunter Acquisition Data (Agilent) |                   |             |                     |               |                       |                 |               |                       |       |                |                       |       |
| <table border="1"> <thead> <tr> <th>Internal standard</th> <th>Fragment(s)</th> <th>Endogenous subclass</th> </tr> </thead> <tbody> <tr> <td>13C16-9-PAHSA</td> <td>m/z 553.5 → m/z 271.3</td> <td>PAHSA and POHSA</td> </tr> <tr> <td>13C16-5-PAHSA</td> <td>m/z 553.5 → m/z 271.3</td> <td>PAHSA</td> </tr> <tr> <td>13C18-12-OAHSA</td> <td>m/z 581.6 → m/z 299.3</td> <td>OAHSA</td> </tr> </tbody> </table> |                          |                                |                                                               | Internal standard | Fragment(s) | Endogenous subclass | 13C16-9-PAHSA | m/z 553.5 → m/z 271.3 | PAHSA and POHSA | 13C16-5-PAHSA | m/z 553.5 → m/z 271.3 | PAHSA | 13C18-12-OAHSA | m/z 581.6 → m/z 299.3 | OAHSA |
| Internal standard                                                                                                                                                                                                                                                                                                                                                                                                | Fragment(s)              | Endogenous subclass            |                                                               |                   |             |                     |               |                       |                 |               |                       |       |                |                       |       |
| 13C16-9-PAHSA                                                                                                                                                                                                                                                                                                                                                                                                    | m/z 553.5 → m/z 271.3    | PAHSA and POHSA                |                                                               |                   |             |                     |               |                       |                 |               |                       |       |                |                       |       |
| 13C16-5-PAHSA                                                                                                                                                                                                                                                                                                                                                                                                    | m/z 553.5 → m/z 271.3    | PAHSA                          |                                                               |                   |             |                     |               |                       |                 |               |                       |       |                |                       |       |
| 13C18-12-OAHSA                                                                                                                                                                                                                                                                                                                                                                                                   | m/z 581.6 → m/z 299.3    | OAHSA                          |                                                               |                   |             |                     |               |                       |                 |               |                       |       |                |                       |       |
| Type of quantification                                                                                                                                                                                                                                                                                                                                                                                           | Internal standard amount | Batch correction               | No                                                            |                   |             |                     |               |                       |                 |               |                       |       |                |                       |       |
| Response correction                                                                                                                                                                                                                                                                                                                                                                                              | No                       | Further quantification remarks | -                                                             |                   |             |                     |               |                       |                 |               |                       |       |                |                       |       |
| Type I isotope correction                                                                                                                                                                                                                                                                                                                                                                                        | No                       |                                |                                                               |                   |             |                     |               |                       |                 |               |                       |       |                |                       |       |
