# Supplementary material for: Inflammation causes insulin resistance in mice via interferon regulatory factor 3 (IRF3)-mediated reduction in FAHFA levels
Source: PubMed Central journal article supplement (PMC11139994; doi:10.1038/s41467-024-48220-5), 2024-05-30
Supplement: 41467_2024_48220_MOESM3_ESM.pdf [file 41467_2024_48220_MOESM3_ESM.pdf]

## Description of Additional Supplementary Files

**Supplementary Data 1:** Gene expression in adipocytes expressing IRF3-2D vs. GFP (associated with main Figure 5). Fold change calculated as mean in IRF3-2D over mean in GFP.
